# Supplementary material for: The First Report of Polymorphisms and Genetic Features of the prion-like Protein Gene (PRND) in a Prion Disease-Resistant Animal, Dog
Source: MDPI journal article supplement (doi:10.3390/ijms20061404), 2019-03-20
Supplement: s1 [file s1]

**Supplementary Table 1.** Linkage Disequilibrium (LD) between polymorphisms (SNPs) of *PRNP* and *PRND* gene with  $r^2$  value in dogs.

| <i>PRNP</i>               | <i>PRND</i> |          |          |          |
|---------------------------|-------------|----------|----------|----------|
|                           | c.149G>A    | c.447T>C | c.465C>T | c.556G>C |
| c.190in/del<br>(codon 64) | 0.071       | 0.0      | 0.0      | 0.071    |
| c.198T>C<br>(codon 66)    | 0.228       | 0.018    | 0.018    | 0.228    |
| c.301A>G<br>(codon 101)   | 0.282       | 0.008    | 0.008    | 0.282    |
| c.372G>A<br>(codon 124)   | 0.003       | 0.0      | 0.0      | 0.003    |
| c.489C>G<br>(codon 163)   | 0.205       | 0.001    | 0.001    | 0.205    |
| c.545A>G<br>(codon 182)   | 0.024       | 0.0      | 0.0      | 0.024    |
| c.546C>A<br>(codon 182)   | 0.002       | 0.0      | 0.0      | 0.002    |
| c.729T>C<br>(codon 243)   | 0.173       | 0.001    | 0.001    | 0.173    |

**Supplementary Table 2.** Linkage Disequilibrium (LD) between polymorphisms of *PRNP* and *PRND* gene with D' value in dogs.

| <i>PRNP</i>               | <i>PRND</i> |          |          |          |
|---------------------------|-------------|----------|----------|----------|
|                           | c.149G>A    | c.447T>C | c.465C>T | c.556G>C |
| c.190in/del<br>(codon 64) | 1.0         | 1.0      | 1.0      | 1.0      |
| c.198T>C<br>(codon 66)    | 0.552       | 1.0      | 1.0      | 0.552    |
| c.301A>G<br>(codon 101)   | 0.916       | 1.0      | 1.0      | 0.916    |
| c.372G>A<br>(codon 124)   | 0.999       | 1.0      | 1.0      | 0.999    |
| c.489C>G<br>(codon 163)   | 0.695       | 1.0      | 1.0      | 0.695    |
| c.545A>G<br>(codon 182)   | 0.67        | 1.0      | 1.0      | 0.67     |
| c.546C>A<br>(codon 182)   | 1.0         | 1.0      | 1.0      | 1.0      |
| c.729T>C<br>(codon 243)   | 0.681       | 1.0      | 1.0      | 0.681    |
